# Supplementary material for: Methane preconcentration by adsorption: a methodology for materials and conditions selection
Source: Springer Nature journal article supplement (doi:10.1007/s10450-014-9609-9), 2014-04-25
Supplement: MOESM1 [file 10450_2014_9609_MOESM1_ESM.pdf]

## **Online Resource**

### **Methane Preconcentration by Adsorption A methodology for materials and conditions selection**

Simon Eyer, Nicholas P. Stadie, Andreas Borgschulte, Lukas Emmenegger, and Joachim Mohn

Simon Eyer, Lukas Emmenegger, Joachim Mohn

Empa, Laboratory for Air Pollution & Environmental Technology,

Überlandstrasse 129,

8600 Dübendorf, Switzerland

Nicholas P. Stadie, Andreas Borgschulte

Empa, Laboratory of Hydrogen & Energy,

Überlandstrasse 129,

8600 Dübendorf, Switzerland

Corresponding author (Simon Eyer):

Tel.: +41 58 765 42 59

Fax: +41 58 765 42 59

E-mail: [simon.eyer@empa.ch](mailto:simon.eyer@empa.ch)

Adsorption

In the supplementary material, selection and optimization of fitting procedures (adsorption model and parameterization) for experimentally measured adsorption isotherms (Figure 1 – 6) are discussed. Methane and nitrogen adsorption isotherms were collected in two temperature regions: at “high” temperatures (T= 196, 273, and 296 K) to calculate the isosteric enthalpy of adsorption and evaluate the selectivity for CH<sub>4</sub> over N<sub>2</sub>, and at “low” temperature (T = 77 K) to determine the adsorbent surface area. Details on the applied fitting procedures and the derived parameters are given in the following sections.

### High temperature adsorption isotherms (196, 273, 296 K)

Adsorption isotherms of CH<sub>4</sub> and N<sub>2</sub> were collected in the pressure range from 0 to 100 kPa at three temperatures (196, 273 and 296 K). Based on this data, the selectivity of CH<sub>4</sub> over N<sub>2</sub> and the isosteric enthalpy of adsorption were calculated for all six candidate adsorbents, as presented in the “Results and discussion” section of the manuscript. Isotherms were fitted by both a second order virial equation (Eq. 1) and a Langmuir equation, and the goodness of fit was compared (as shown in Figure O1).

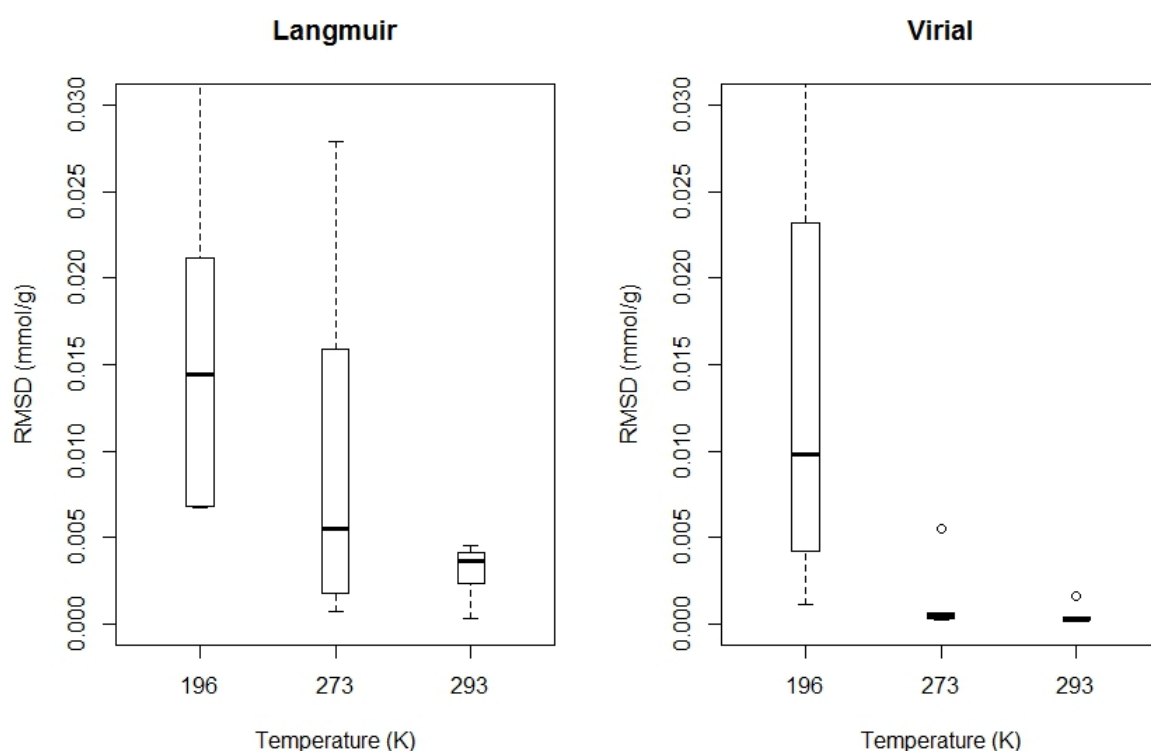

**Figure O1:** Root-mean square deviation (RMSD) of CH<sub>4</sub> isotherms from Langmuir and virial equation fits for all candidate materials at different adsorption temperatures.

$$RMSD = \sqrt{\sum_{k=0}^n (y_i - f_i)^2 / n} \quad (\text{Eq. O1})$$

The goodness of fit was determined by summing the least square residuals for each point, according to Eq. O1. Figure O1 reveals that the agreement of the virial equation with the experimental data is superior to the Langmuir model especially at higher temperatures. In Table O1 the respective error

values are given and in Table O2 the optimized fit parameters for a second order virial equation for each candidate material are given.

| CH <sub>4</sub> | T     | HayeSep D | MWCNT     | HKUST-1   | ZIF-8     | Z5A       | Z13X      |
|-----------------|-------|-----------|-----------|-----------|-----------|-----------|-----------|
| Langmuir        | 196 K | 0.0067022 | 0.0067880 | 0.0374812 | 0.0176922 | 0.0112182 | 0.0211841 |
|                 | 273 K | 0.0007018 | 0.0017387 | 0.0278759 | 0.0048329 | 0.0061464 | 0.0158652 |
|                 | 296 K | 0.0003203 | 0.0023366 | 0.0044858 | 0.0041373 | 0.0041196 | 0.0031918 |
| Virial          | 196 K | 0.0011105 | 0.0047162 | 0.0320524 | 0.0042345 | 0.0148083 | 0.0232007 |
|                 | 273 K | 0.0003261 | 0.0006095 | 0.0054833 | 0.0002609 | 0.0004430 | 0.0004663 |
|                 | 296 K | 0.0001979 | 0.0004289 | 0.0016017 | 0.0002049 | 0.0001780 | 0.0002803 |

**Table O1:** Root-mean square deviation (RMSD) (mmol/g) of CH<sub>4</sub> isotherms from Langmuir and virial equation fits for all candidate materials at different adsorption temperatures.

| Material        | a <sub>0</sub> | a <sub>1</sub> | a <sub>2</sub> | b <sub>0</sub> | b <sub>1</sub> | b <sub>2</sub> | ΔH <sub>0</sub><br>(kJ mol <sup>-1</sup> ) |        |
|-----------------|----------------|----------------|----------------|----------------|----------------|----------------|--------------------------------------------|--------|
| CH <sub>4</sub> | HayeSep D      | -2397.720      | 1052.420       | -1906.380      | 14.515         | -3.916         | 9.454                                      | 19.935 |
|                 | MWCNT          | -1899.880      | -1238.260      | 4554.410       | 12.556         | 7.724          | -23.561                                    | 15.796 |
|                 | HKUST-1        | -1882.530      | -130.870       | -8.977         | 10.958         | 0.633          | 0.056                                      | 15.651 |
|                 | ZIF-8          | -1676.200      | -51.416        | 52.072         | 11.650         | 0.263          | -0.258                                     | 13.936 |
|                 | Zeolite 5A     | -2547.020      | -292.460       | 7.361          | 13.711         | 1.138          | 0.292                                      | 21.176 |
|                 | Zeolite 13X    | -2206.770      | -488.529       | 419.245        | 13.248         | 2.020          | -1.842                                     | 18.347 |
| N <sub>2</sub>  | HayeSep D      | -1519.140      | -105.573       | -10420.700     | 12.865         | 0.226          | 54.753                                     | 12.630 |
|                 | MWCNT          | -1696.560      | -1579.990      | -10000.000     | 13.049         | 10.115         | 50.408                                     | 14.105 |
|                 | HKUST-1        | -1698.160      | 21.277         | -476.111       | 11.463         | 0.033          | 2.425                                      | 14.119 |
|                 | ZIF-8          | -1365.400      | 1675.840       | -13963.400     | 11.738         | -8.398         | 71.200                                     | 11.352 |
|                 | Zeolite 5A     | -3140.820      | 443.578        | -16.857        | 16.041         | -0.828         | 0.067                                      | 26.113 |
|                 | Zeolite 13X    | -2201.770      | 781.992        | -3238.400      | 13.811         | -3.541         | 16.597                                     | 18.306 |

**Table O2:** Fit parameters for second order virial-type equation and the derived isosteric enthalpy of adsorption for the studied candidate adsorbents.

### Low temperature adsorption isotherms (77 K)

Adsorption isotherms of CH<sub>4</sub> and N<sub>2</sub> at liquid nitrogen temperature (77 K) were determined for all candidate adsorbents and fitted with both the BET and Langmuir model to determine the surface area of each material. The quality of each fit was assessed based on the R<sup>2</sup> value. In Table O3, the specific surface areas (SSA) calculated using the BET and the Langmuir model, as well as the number of data points included in the fit and the R<sup>2</sup> values are given. Numbers in bold correspond to a better model fit (R<sup>2</sup> values). The model selection agrees well with the qualitative evaluation as discussed in the section “surface area” of the main manuscript. For the metal-organic frameworks (HKUST-1 and ZIF-8), the calculated surface area was highly dependent on the selected model. For methane adsorption on HayeSep D both models agreed similarly well, but resulted in very different surface areas. Based on its slightly higher R<sup>2</sup> value and better consistency with the macroporous structure of HayeSep D the BET model was selected.

|         | N <sub>2</sub> |                |                         |            |                |                         | CH <sub>4</sub> |                |                         |            |                |                         |
|---------|----------------|----------------|-------------------------|------------|----------------|-------------------------|-----------------|----------------|-------------------------|------------|----------------|-------------------------|
|         | BET            |                |                         | Langmuir   |                |                         | BET             |                |                         | Langmuir   |                |                         |
|         | No. Points     | R <sup>2</sup> | SSA (m <sup>2</sup> /g) | No. Points | R <sup>2</sup> | SSA (m <sup>2</sup> /g) | No. Points      | R <sup>2</sup> | SSA (m <sup>2</sup> /g) | No. Points | R <sup>2</sup> | SSA (m <sup>2</sup> /g) |
| HSD     | <b>11</b>      | <b>0.995</b>   | <b>609</b>              | 11         | 0.996          | 640                     | <b>9</b>        | <b>0.999</b>   | <b>856</b>              | 9          | 0.996          | 1300                    |
|         | <b>18</b>      | <b>0.999</b>   | <b>692</b>              |            |                |                         | <b>7</b>        | <b>0.999</b>   | <b>887</b>              | 7          | 0.998          | 1181                    |
| CNT     | <b>11</b>      | <b>0.999</b>   | <b>390</b>              | 6          | 0.999          | 385                     | <b>7</b>        | <b>1.000</b>   | <b>481</b>              | 7          | 0.998          | 547                     |
|         | <b>5</b>       | <b>1.000</b>   | <b>361</b>              |            |                |                         | <b>16</b>       | <b>1.000</b>   | <b>501</b>              |            |                |                         |
| HKUST-1 | 16             | 0.997          | 1532                    | <b>40</b>  | <b>1.000</b>   | <b>1690</b>             | <b>54</b>       | <b>0.816</b>   | <b>2183</b>             | 54         | 0.552          | 5178                    |
|         | 7              | 1.000          | 1462                    |            |                |                         | <b>57</b>       | <b>0.770</b>   | <b>1505</b>             | 57         | 0.931          | 2526                    |
| ZIF-8   | 28             | 0.986          | 1473                    | <b>34</b>  | <b>1.000</b>   | <b>1702</b>             | <b>48</b>       | <b>0.784</b>   | <b>1240</b>             | 22         | 0.977          | 1988                    |
|         | 24             | 0.953          | 1619                    |            |                |                         | <b>32</b>       | <b>0.936</b>   | <b>1753</b>             |            |                |                         |
| Z5A     | 14             | 1.000          | 462                     | <b>40</b>  | <b>1.000</b>   | <b>537</b>              | 10              | 0.965          | 552                     | <b>57</b>  | <b>0.999</b>   | <b>622</b>              |
| Z13X    | 6              | 1.000          | 540                     | <b>29</b>  | <b>0.999</b>   | <b>628</b>              | 17              | 0.812          | 510                     | <b>18</b>  | <b>0.973</b>   | <b>794</b>              |

**Table O3:** Fitting parameters of the BET and the Langmuir model for N<sub>2</sub> and CH<sub>4</sub> adsorption isotherms of different candidate adsorbents, including the number of fitted points, R<sup>2</sup> values and the specific surface area (SSA). The numbers in bold indicate a better model fit (R<sup>2</sup> value).
